# Supplementary material
Source: Research Square preprint supplement (doi:10.21203/rs.3.rs-10118257/v1)

## Appendix

**Supplementary Table 1: National-level public health communication activities in the first 3 months following detections of cVDPV2 in wastewater in Germany, 2024–2025.**

| Communication activity                                                 | Conducted or published by | Target audience                                                     | Publication date   | Reference/ Link to source (in German)                                                                                                                                                                                                                                                                                                                                                                                                                                                                                                                                                                                                             |
|------------------------------------------------------------------------|---------------------------|---------------------------------------------------------------------|--------------------|---------------------------------------------------------------------------------------------------------------------------------------------------------------------------------------------------------------------------------------------------------------------------------------------------------------------------------------------------------------------------------------------------------------------------------------------------------------------------------------------------------------------------------------------------------------------------------------------------------------------------------------------------|
| Threat report #1                                                       | RKI                       | Public health authorities and medical community                     | 2024/28/11         | <a href="https://www.doi.org/10.25646/12938">https://www.doi.org/10.25646/12938</a>                                                                                                                                                                                                                                                                                                                                                                                                                                                                                                                                                               |
| Social media posts                                                     | RKI                       | Public health authorities and medical community; general population | 2024/11/28 onwards | <a href="https://www.instagram.com/p/DC6swDjIF42/">https://www.instagram.com/p/DC6swDjIF42/</a> (2024/11/28)<br><a href="https://www.instagram.com/p/DDhNhxc0oOV/">https://www.instagram.com/p/DDhNhxc0oOV/</a> (2024/12/13)<br><a href="https://www.instagram.com/p/DFNI16N0eN3/">https://www.instagram.com/p/DFNI16N0eN3/</a> (2025/01/24)                                                                                                                                                                                                                                                                                                      |
| RKI Guidance on Poliomyelitis                                          | RKI                       | Public health authorities and medical community                     | 2024/11/28         | <a href="https://www.rki.de/DE/Aktuelles/Publikationen/RKI-Ratgeber/Ratgeber_Poliomyelitis.html">https://www.rki.de/DE/Aktuelles/Publikationen/RKI-Ratgeber/Ratgeber_Poliomyelitis.html</a>                                                                                                                                                                                                                                                                                                                                                                                                                                                       |
| Info websites on poliomyelitis                                         | BIOEG                     | General population                                                  | 2024/11/29 onwards | <a href="https://web.archive.org/web/20241208131630/https://www.impfen-info.de/impfempfehlungen/fuer-kinder-0-12-jahre/polio-kinderlaehmung/#tab-24132-c10153">https://web.archive.org/web/20241208131630/https://www.impfen-info.de/impfempfehlungen/fuer-kinder-0-12-jahre/polio-kinderlaehmung/#tab-24132-c10153</a><br><a href="https://web.archive.org/web/20241201000619/https://www.infektionsschutz.de/">https://web.archive.org/web/20241201000619/https://www.infektionsschutz.de/</a><br><a href="https://web.archive.org/web/20241129190811/https://www.bzga.de/">https://web.archive.org/web/20241129190811/https://www.bzga.de/</a> |
| Radio spot                                                             | BMG                       | General population                                                  | December 2024      | NA                                                                                                                                                                                                                                                                                                                                                                                                                                                                                                                                                                                                                                                |
| Threat report #2                                                       | RKI                       | Public health authorities and medical community                     | 2024/12/04         | <a href="https://www.doi.org/10.25646/12945">https://www.doi.org/10.25646/12945</a>                                                                                                                                                                                                                                                                                                                                                                                                                                                                                                                                                               |
| Frequently asked questions around poliovirus detections in wastewater  | RKI                       | General population                                                  | 2024/12/09         | <a href="http://rki.de/polio-abwasser-faq">http://rki.de/polio-abwasser-faq</a>                                                                                                                                                                                                                                                                                                                                                                                                                                                                                                                                                                   |
| Statement by Germany's National Immunization Technical Advisory Group  | STIKO                     | Public health authorities and medical community                     | 2024/12/12         | <a href="https://doi.org/10.25646/12958">https://doi.org/10.25646/12958</a>                                                                                                                                                                                                                                                                                                                                                                                                                                                                                                                                                                       |
| Scientific publication on polio immunization coverage                  | RKI                       | Public health authorities and medical community                     | 2024/12/12         | <a href="https://doi.org/10.25646/12955">https://doi.org/10.25646/12955</a>                                                                                                                                                                                                                                                                                                                                                                                                                                                                                                                                                                       |
| Flowchart to check the polio vaccination status of children and adults | RKI                       | General population                                                  | 2024/12/17         | <a href="https://www.rki.de/DE/Themen/Infektionskrankheiten/Impfen/Impfungen-A-Z/Poliomyelitis-Kinderlaehmung/Impfstatus-Ueberpruefung-Tab.html">https://www.rki.de/DE/Themen/Infektionskrankheiten/Impfen/Impfungen-A-Z/Poliomyelitis-Kinderlaehmung/Impfstatus-Ueberpruefung-Tab.html</a>                                                                                                                                                                                                                                                                                                                                                       |
| Statement by the National Committee for Poliomyelitis Eradication      | NCC                       | Public health authorities and medical community                     | 2024/12/20         | <a href="https://www.rki.de/DE/Themen/Infektionskrankheiten/Impfen/Eliminationsprogramme/Kommission-Polioeradikation/Stellungnahme_2024-12-20.html">https://www.rki.de/DE/Themen/Infektionskrankheiten/Impfen/Eliminationsprogramme/Kommission-Polioeradikation/Stellungnahme_2024-12-20.html</a>                                                                                                                                                                                                                                                                                                                                                 |
| Threat report #3                                                       | RKI                       | Public health authorities and medical community                     | 2025/01/24         | <a href="https://edoc.rki.de/handle/176904/12373">https://edoc.rki.de/handle/176904/12373</a>                                                                                                                                                                                                                                                                                                                                                                                                                                                                                                                                                     |

**Abbreviations:** BIOEG = Bundesinstitut für Öffentliche Gesundheit (German Institute of Public Health); BMG = Bundesministerium für Gesundheit (German Federal Ministry of Health); NA = not available; NCC = National Committee for Poliomyelitis Eradication; RKI = Robert Koch Institute.

**Supplementary Figure 1. Knowledge about polio and the polio vaccine.**

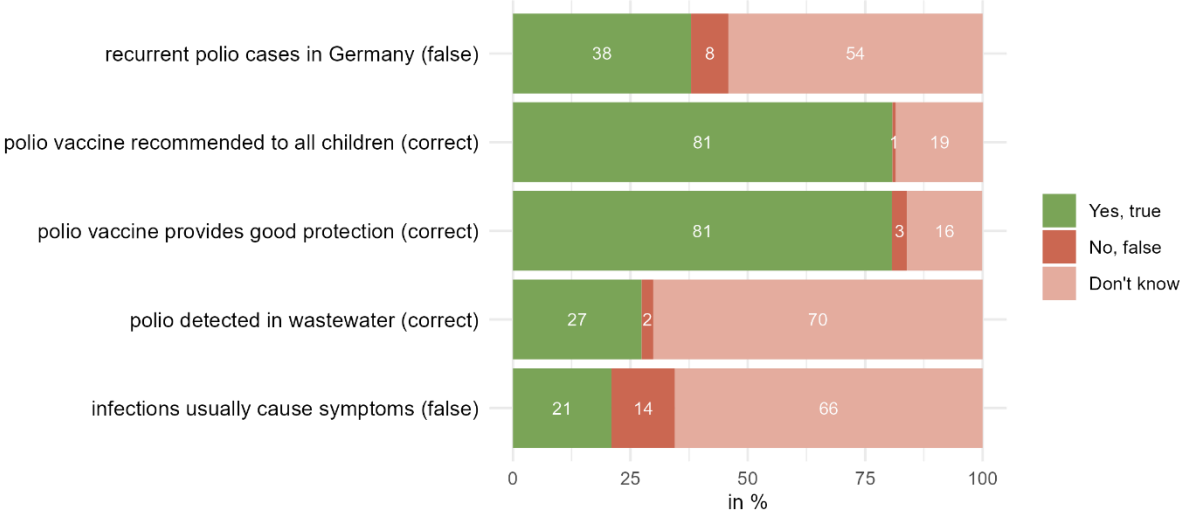

Supplement: Supplementary file 1 [file a146bb5d1613dbb501ccaa7f.pdf]
